# Supplementary material for: Cholesterol Lowering Modulates T Cell Function In Vivo and In Vitro
Source: PLOS journal article supplement (doi:10.1371/journal.pone.0092095), 2014-03-19

**Fig. S3**

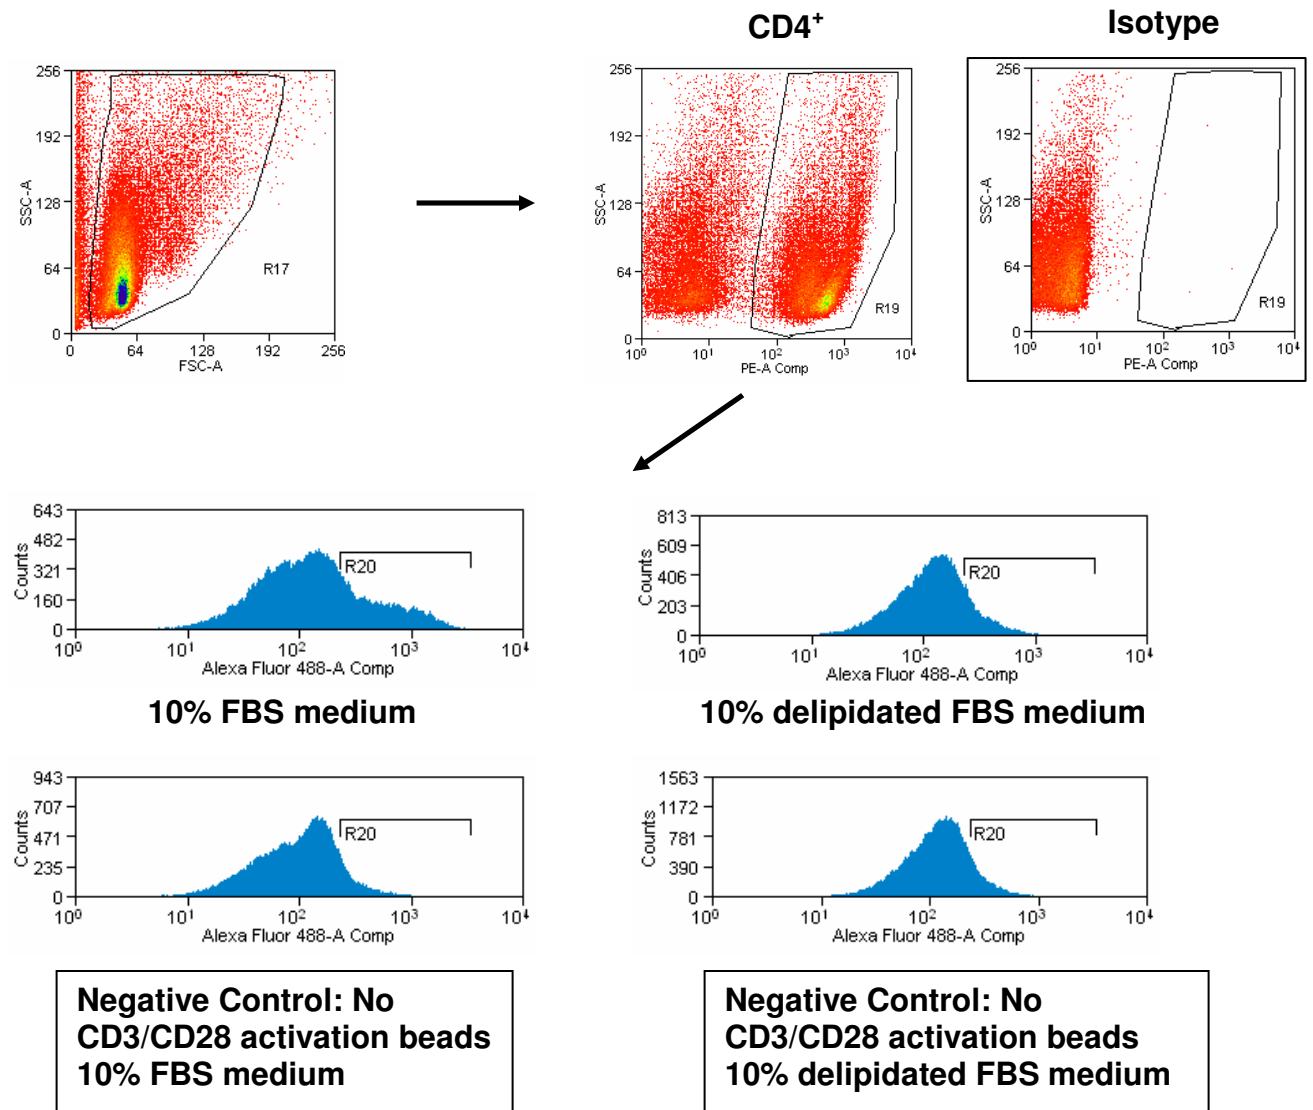

Supplement: S3 (10.1371/journal.pone.0092095.s003) [file journal.pone.0092095.s003]
